# Socio-economic status and prevention of cardiovascular disease in Italy: evidence from a national health survey

Gianfranco Damiani<sup>1</sup>, Bruno Federico<sup>2</sup>, Caterina B.N.A. Bianchi<sup>1</sup>,  
Alessandra Ronconi<sup>1</sup>, Danila Basso<sup>1</sup>, Sonia Fiorenza<sup>1</sup>, Franco Sassi<sup>3</sup>

1 Department of Public Health, Università Cattolica del Sacro Cuore, Rome, Italy

2 Department of Health and Sport Sciences, Cassino, Italy

3 Health Division, Directorate for Employment, Labour and Social Affairs, OECD-Organization for Economic Cooperation and Development, Paris, France

**Correspondence:** Gianfranco Damiani, Department of Public Health, Università Cattolica del Sacro Cuore, Largo F. Vito, 1, 00168 Rome, Italy, tel: +39 6 30155837, fax: +39 6 3053168, e-mail: gdamiani@rm.unicatt.it

Received 22 December 2009, accepted 14 May 2010

**Background:** Cardiovascular disease (CVD) is the leading cause of death and disability in the world. Many cardiovascular risk factors can be prevented. We assessed whether socio-economic factors are associated with individual preventive behaviours in Italy. **Methods:** A cross-sectional analysis of a nationally representative sample of 47 391 adults aged 40–69 years was undertaken using 2004–05 National Health Interview Survey data. Logistic regression models were developed to assess the association between socio-economic status (SES) and regular monitoring of blood pressure, cholesterol, body mass index and glycaemia. SES was estimated according to education and occupation. **Results:** SES was significantly associated with regular monitoring of risk factors for CVD. The most educated were more likely to monitor cholesterol levels than those with less education [men odds ratio (OR) 1.64, 95% confidence interval (CI) 1.46–1.86; women OR 1.36, 95% CI 1.19–1.55]. Individuals in the highest occupational class controlled weight more frequently than those disadvantaged with an OR of 1.24 (95% CI 1.04–1.49) for men and an OR of 1.26 (95% CI 1.12–1.42) for women. **Conclusion:** Socio-economic disparities in the prevention of risk factors for CVD were clearly observed among Italian adults, generally favouring higher socio-economic groups.

**Keywords:** cardiovascular risk factors, preventive behaviours, socio-economic factors

## Introduction

Cardiovascular disease (CVD) is the leading cause of death and disability in the world. Although many forms of CVD can be treated or prevented, it is estimated that 17 million people die globally of CVDs. In Italy 28% of deaths in the age range 35–74 years are due to CVD. Evidence from national and local research in Italy shows that mortality increases linearly with social disadvantage, and that poorer and less-educated people have inadequate access both to primary prevention and early diagnosis.<sup>1</sup>

Smoking, hypertension, hypercholesterolemia, diabetes, obesity and physical inactivity are factors which increase the risk of CVD.<sup>2,3</sup> These risk factors can be prevented, if identified early or controlled through regular monitoring and the adoption of healthy lifestyles.

Therefore, prevention and health promotion have become a priority for many governments. Limiting cardiovascular mortality through the detection of risk factors such as hypertension and hypercholesterolemia is among the goals of Public Health Service's Healthy People 2010, which is a set of health objectives that States or communities aim to achieve over the first decade of the new century.<sup>4</sup> The Canadian Task Force on Preventive Health Care recommends physicians to counsel patients on nutritional habits, physical activity, smoking cessation and to offer blood pressure monitoring for all adults.<sup>5</sup>

In Italy, a National Prevention Plan (NPP) recommends regular monitoring of blood pressure, cholesterol and

glycaemia for adults aged 40–69 years through a 'Cardiovascular Risk Chart'.<sup>6</sup> This chart allows to estimate the likelihood of experiencing a first cardiovascular event over the following 10 years, once the values of six risk factors (sex, history of diabetes, smoking, age, systolic blood pressure and total serum cholesterol) are known.

Although the monitoring of hypertension and hypercholesterolemia can substantially reduce the future risk of CVD and mortality, an increasing body of evidence has revealed the presence of socio-economic disparities in the use of preventive services.<sup>7–11</sup>

Equal access to health prevention was targeted by the 'Health For All' agenda<sup>12</sup> and restated by several countries of the Organization for Economic Cooperation and Development such as Canada and France.<sup>13,14</sup> In the UK, interventions to reduce socio-economic disparities by improving the health status of the less affluent groups, were set as an important priority.<sup>15,16</sup> According to this international scenario, also the Italian National Health System (INHS) set equal access to health care as one of the main goals of the public agenda.<sup>17</sup>

In Italy several studies have shown the role of socio-economic determinants of inequalities in incidence and mortality for CVD.<sup>18,19</sup> Moreover, an inverse association between the prevalence of major cardiovascular risk factors and socio-economic status (SES) was observed.<sup>20</sup> In particular, an increasing trend of serum cholesterol and body weight was found among women with low educational level.<sup>21</sup> These findings appeared as indirect indicators of differences in access to preventive health care related to socio-economic

factors.<sup>1</sup> Recently published national reports showed that adults with higher educational levels were more likely to adopt preventive behaviours than those with lower levels, even though the magnitude of the inequality did not appear to be large.<sup>22,23</sup>

The aim of this study is to evaluate the association between SES and the adoption of cardiovascular preventive behaviours, such as regular measurement of cholesterol, glycaemia, blood pressure and body weight.

## Methods

We used the interview data from a national survey on 'Health conditions and health care services use' conducted by the Italian National Centre for Statistics (Istat) in 2004–05, which provides comprehensive information about health-care use. This survey was based on a random sample of ~120 000 individuals, stratified by geographical area, municipality and household size.<sup>22</sup> The questions about health status and health-care use were collected through face to face interviews, whereas the questions related to lifestyle and prevention use were recorded through a self-administered questionnaire. In the case of missing values, the survey used an automatic procedure of data imputation on the basis of the following variables: gender, age, occupation, education, municipality size, and geographic area of residence.<sup>24</sup>

In order to evaluate individuals with a potentially high cardiovascular risk, we restricted the analysis to the age group 40–69 years, according to the information provided by the 'Cardiovascular Risk Chart' ( $n = 50\,736$ ). We excluded those respondents ( $n = 3345$ ) who reported CVDs (myocardial infarction, angina, other hearth diseases and stroke) at the time of interview or in the past. The final sample consisted of 47 391 subjects: 22 715 men and 24 676 women.

Periodic controls of cholesterol, glycaemia, blood pressure and weight were identified as dependent variables. In accordance with national and international recommendations and guidelines, the frequency of preventive action was considered 'appropriate' if there was at least one measurement of cholesterol serum level every 5 years and one measurement of glycaemia, blood pressure and weight every year.<sup>25–28</sup>

As independent variables we used two indicators of SES: education and occupational class. Education was measured based on the highest successfully completed qualification. We classified education in the following three levels: High school and over (upper secondary education diploma or university degree); Secondary school (lower secondary education diploma) and Primary school or less. Occupational class was measured using a modified version of the UK National Statistics Socio-economic Classification.<sup>29</sup> Four classes were considered: High (managerial and professional occupations); Medium (intermediate occupations, small employers and own account workers); Low (routine and manual occupations); Not working (never worked and long-term unemployed). Classes were created by combining data on occupation and employment status (whether an employer, self-employed or employee; whether a supervisor, manager, etc).

## Statistical analyses

We used multiple logistic regressions to assess the effect of SES (education and occupational class) on preventive behaviours, adjusting for potential confounding factors. We controlled for patient characteristics like age, region of residence, marital status, self-assessed health status and cardiovascular risk conditions as hypertension, diabetes, smoking status (cigarettes) and overweight or obesity [according to body mass index (BMI)]. Analyses were stratified by sex, in order

to assess whether the relationship between socioeconomic status and the outcome variables were modified by sex.

The odds ratio (ORs) and corresponding 95% confidence intervals (CIs) were used as measure of effect. All statistical analyses were performed using SPSS 16.0 and Stata 10.1 for Windows software. We used sampling weights in all of the analyses, to reflect the multistage sampling design of the survey.<sup>22</sup>

## Results

Table 1 describes the characteristics of the sample by sex. About half of the sample had a regular check of glycaemia and blood pressure, while almost 80% of the respondents measured cholesterol at least one every 5 years both for women and for men. Regular check of weight was more frequent among women (59.9%) compared with men (43.2%).

Table 2 shows age standardized prevalence rates of regular check of cholesterol, glycaemia, blood pressure and weight by level of education and occupational class, stratified by sex. Among men, regular control of cholesterol was more

**Table 1** Characteristics of the sample<sup>a</sup> ( $n = 47\,391$ ; men = 22 715, women = 24 676)

|                                           | Men      |      | Women    |      |
|-------------------------------------------|----------|------|----------|------|
|                                           | <i>n</i> | %    | <i>n</i> | %    |
| Age groups                                |          |      |          |      |
| 40–49                                     | 9167     | 40.4 | 9591     | 38.9 |
| 50–59                                     | 7785     | 34.3 | 8404     | 34.1 |
| 60–69                                     | 5763     | 25.4 | 6681     | 27.1 |
| Region of residence                       |          |      |          |      |
| Central Italy                             | 4158     | 18.3 | 4509     | 18.3 |
| North-western Italy                       | 5003     | 22.0 | 5628     | 22.8 |
| North-eastern Italy                       | 4673     | 20.6 | 4986     | 20.2 |
| Southern Italy                            | 6367     | 28.0 | 6813     | 27.6 |
| Italian Islands                           | 2514     | 11.1 | 2740     | 11.1 |
| Level of education                        |          |      |          |      |
| Primary school or less                    | 5739     | 25.3 | 8385     | 34.0 |
| Secondary school                          | 7854     | 34.6 | 7610     | 30.8 |
| High school and over                      | 9122     | 40.2 | 8681     | 35.2 |
| Occupational class                        |          |      |          |      |
| Not working                               | 893      | 3.9  | 7055     | 28.6 |
| Low                                       | 8593     | 37.8 | 7457     | 30.2 |
| Medium                                    | 6540     | 28.8 | 7508     | 30.4 |
| High                                      | 6689     | 29.4 | 2656     | 10.8 |
| Risk factors                              |          |      |          |      |
| Hypertension                              | 4059     | 17.9 | 4962     | 20.1 |
| Diabetes                                  | 1232     | 5.4  | 1105     | 4.5  |
| Former smoker                             | 7467     | 32.9 | 3945     | 16.0 |
| Current smoker                            | 6737     | 29.7 | 4696     | 19.0 |
| Pre-obese ( $25 \leq \text{BMI} < 30$ )   | 11 282   | 49.7 | 7459     | 30.2 |
| Obese ( $\text{BMI} \geq 30$ )            | 3071     | 13.5 | 2814     | 11.4 |
| Self Assessed Health Status               |          |      |          |      |
| Good/very good                            | 14 257   | 62.8 | 12 835   | 52.0 |
| Fair                                      | 7663     | 33.7 | 10 405   | 42.2 |
| Very poor/poor                            | 795      | 3.5  | 1436     | 5.8  |
| Marital status                            |          |      |          |      |
| Single                                    | 2593     | 11.4 | 2146     | 8.7  |
| Widowed                                   | 461      | 2.0  | 2304     | 9.3  |
| Divorced/separated                        | 1602     | 7.1  | 1899     | 7.7  |
| Married                                   | 18 059   | 79.5 | 18 327   | 74.3 |
| Preventive behaviours                     |          |      |          |      |
| Cholesterol check at least every 5 years  | 17 924   | 78.9 | 20 345   | 82.4 |
| Glycaemia check at least once a year      | 12 716   | 56.0 | 14 686   | 59.5 |
| Blood pressure check at least once a year | 15 279   | 67.3 | 17 787   | 72.1 |
| Weight check at least once a year         | 9814     | 43.2 | 14 770   | 59.9 |

a: Italian National Health Interview Survey, 2004–05

**Table 2** Age standardized prevalence rates (95% CI) of regular check of cholesterol, glycaemia, blood pressure and weight by sex (Italy, 2004–05)

|                        | Cholesterol <sup>a</sup> | Glycaemia <sup>b</sup> | Blood pressure <sup>b</sup> | Weight <sup>b</sup> |
|------------------------|--------------------------|------------------------|-----------------------------|---------------------|
| <b>Men</b>             |                          |                        |                             |                     |
| Level of education     |                          |                        |                             |                     |
| Primary school or less | 0.75 (0.73–0.76)         | 0.55 (0.53–0.57)       | 0.63 (0.61–0.65)            | 0.34 (0.32–0.35)    |
| Secondary school       | 0.79 (0.78–0.80)         | 0.57 (0.55–0.58)       | 0.68 (0.67–0.70)            | 0.42 (0.40–0.43)    |
| High school and over   | 0.83 (0.82–0.84)         | 0.59 (0.58–0.60)       | 0.70 (0.69–0.71)            | 0.51 (0.50–0.52)    |
| Occupational class     |                          |                        |                             |                     |
| Not working            | 0.74 (0.71–0.77)         | 0.54 (0.50–0.58)       | 0.64 (0.60–0.67)            | 0.37 (0.33–0.41)    |
| Low                    | 0.77 (0.76–0.78)         | 0.56 (0.55–0.57)       | 0.67 (0.66–0.68)            | 0.39 (0.37–0.40)    |
| Medium                 | 0.82 (0.81–0.83)         | 0.58 (0.57–0.60)       | 0.69 (0.68–0.71)            | 0.46 (0.44–0.47)    |
| High                   | 0.82 (0.81–0.83)         | 0.58 (0.57–0.60)       | 0.69 (0.68–0.70)            | 0.49 (0.48–0.51)    |
| <b>Women</b>           |                          |                        |                             |                     |
| Level of education     |                          |                        |                             |                     |
| Primary school or less | 0.81 (0.79–0.82)         | 0.61 (0.59–0.62)       | 0.72 (0.71–0.74)            | 0.54 (0.53–0.56)    |
| Secondary school       | 0.82 (0.81–0.83)         | 0.60 (0.59–0.61)       | 0.72 (0.71–0.74)            | 0.61 (0.60–0.63)    |
| High school and over   | 0.85 (0.84–0.86)         | 0.60 (0.59–0.61)       | 0.73 (0.72–0.74)            | 0.67 (0.65–0.69)    |
| Occupational class     |                          |                        |                             |                     |
| Not working            | 0.82 (0.81–0.83)         | 0.60 (0.59–0.61)       | 0.71 (0.69–0.72)            | 0.55 (0.53–0.56)    |
| Low                    | 0.81 (0.80–0.82)         | 0.59 (0.57–0.60)       | 0.73 (0.72–0.74)            | 0.60 (0.59–0.61)    |
| Medium                 | 0.85 (0.84–0.86)         | 0.61 (0.60–0.63)       | 0.74 (0.73–0.75)            | 0.66 (0.64–0.67)    |
| High                   | 0.86 (0.84–0.87)         | 0.62 (0.60–0.64)       | 0.74 (0.72–0.76)            | 0.65 (0.63–0.67)    |

a: Cholesterol check: at least one measurement every 5 years

b: Glycaemia, blood pressure, weight check: at least one measurement every year

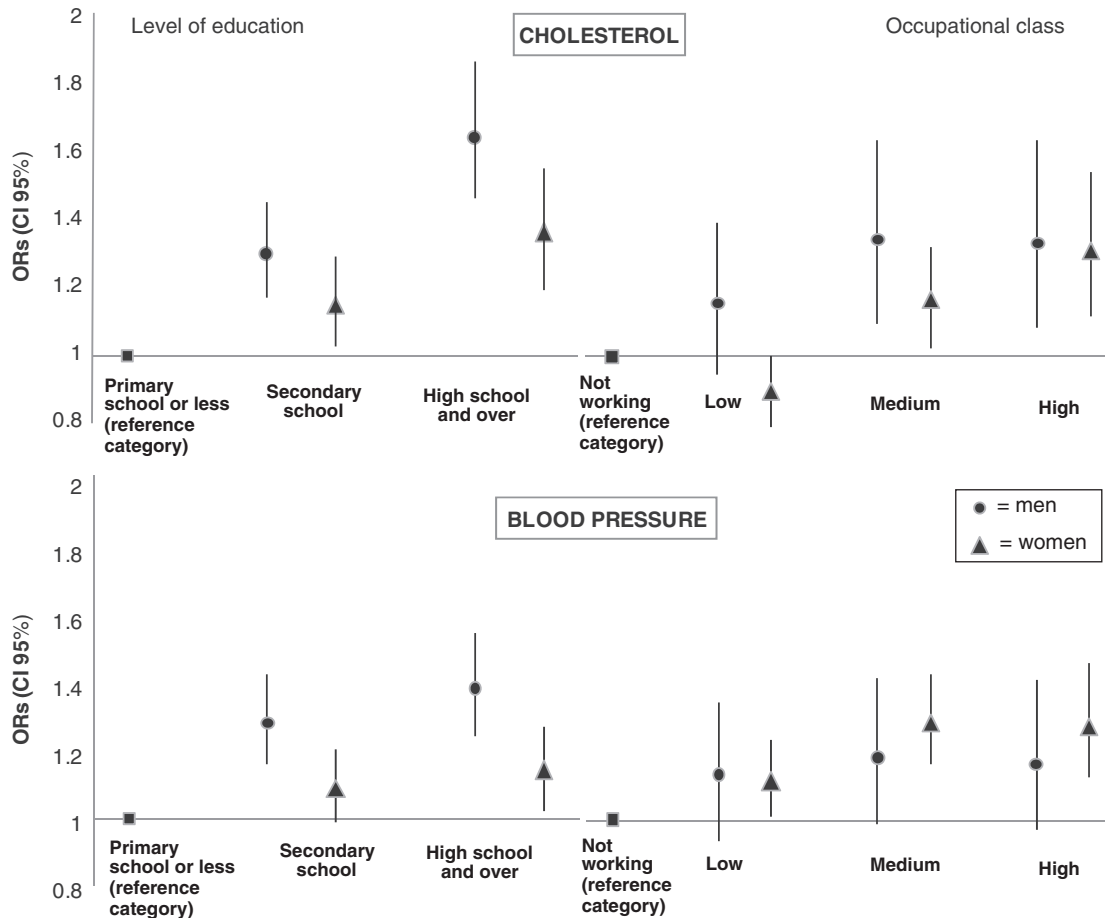

**Figure 1** OR of regular cholesterol and blood pressure checks by level of education and social class adjusted for age, region of residence, cardiovascular risk (hypertension, diabetes, smoking status, BMI), marital status and self-assessed health status. Filled circle: men; filled triangle: women

frequent in the more advantaged groups. Men with lower SES controlled less frequently their glycaemia and blood pressure compared with men with higher SES. A strong association was observed between SES and the likelihood of having a regular check of weight, both for men and for women. No clear socioeconomic differences were apparent among women for

glycaemia and blood pressure control. Among women regular check of cholesterol was less frequent in the more disadvantaged groups.

Figures 1 and 2 show the ORs of having regular check of cardiovascular risk factors by level of education and social class, separately by sex, adjusting for age, region of residence,

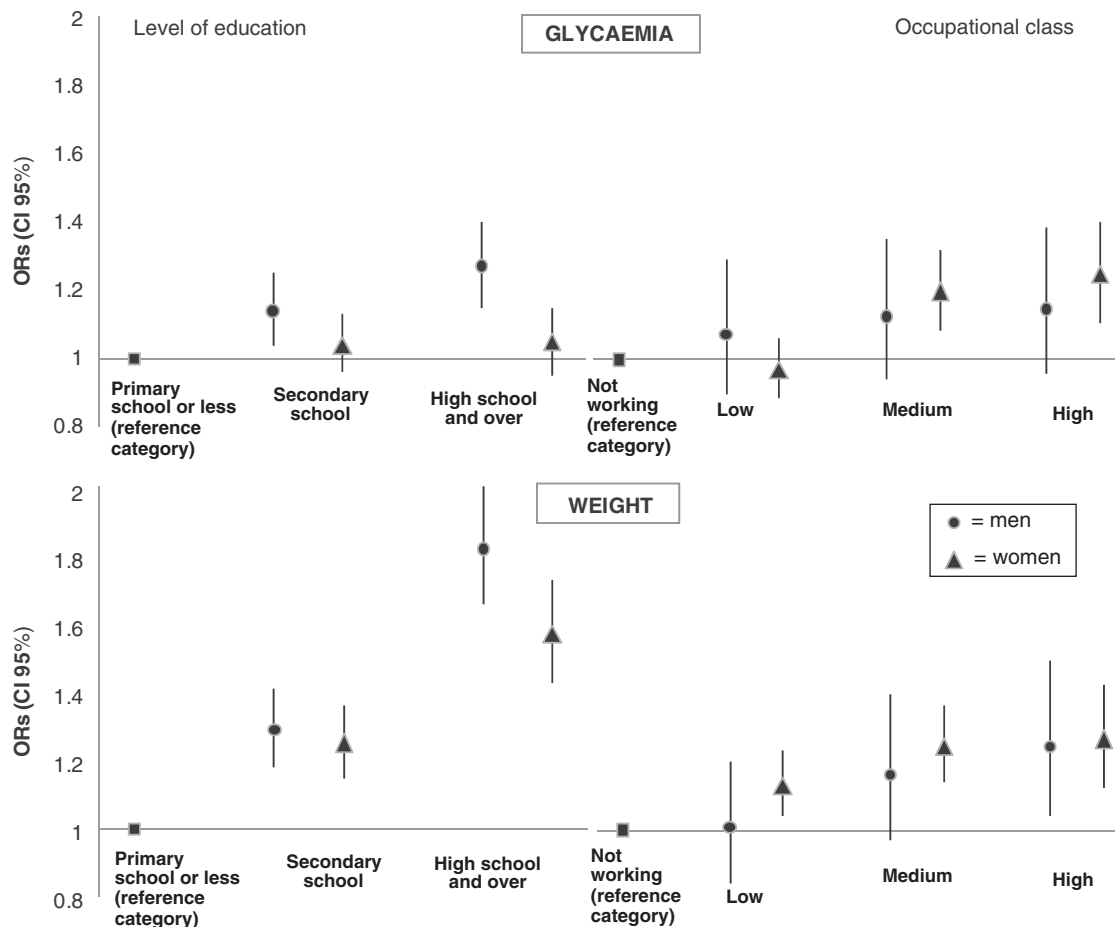

**Figure 2** OR of regular glycaemia and weight checks by level of education and social class adjusted for age, region of residence, cardiovascular risk (hypertension, diabetes, smoking status, BMI), marital status and self-assessed health status. Filled circle: men; filled triangle: women

cardiovascular risk conditions (hypertension, diabetes, smoking status, BMI), marital status and self-assessed health status. The most educated individuals had a higher likelihood of having regular check of all cardiovascular risk factors than those with a lower level of education both for men and women. This association was stronger for men than for women. Men with the highest educational level were more likely to have their cholesterol controlled than those with a lower level with an OR of 1.64 (95% CI 1.46–1.86). Women with the highest level of education checked their cholesterol with an OR of 1.36 (95% CI 1.19–1.55) compared with the least educated.

Individuals of the upper occupational class had a higher odds of blood pressure control than those in the lowest class with an OR of 1.16 (95% CI 0.97–1.40) for men and an OR of 1.27 (95% CI 1.12–1.45) for women. The likelihood of having a regular weight check was higher for individuals in advantaged occupational class with an OR of 1.24 (95% CI 1.04–1.49) for men and an OR of 1.26 (95% CI 1.12–1.42) for women. Differences by socio-economic group were also found for glycaemia control, although their magnitude was generally smaller compared with the other risk factors.

## Discussion

We explored disparities in the adoption of preventive behaviours by SES, defined on the basis of individual education and occupation. Individuals with higher level of education or upper occupational class have a higher likelihood of regularly monitoring cholesterol, glycaemia, blood pressure and weight.

Previous studies on cardiovascular prevention focused on racial and ethnic disparities. Stewart and Silverstein<sup>8</sup> showed that health insurance and usual source of care are important contributors to racial and ethnic disparities in blood pressure and cholesterol measurement in the USA. A number of studies found that older age, female sex and having regular medical doctor are associated with a higher likelihood of receiving cardiovascular screening.<sup>5,30</sup>

Data available from a local population-based screening programme for CVD in UK showed a lower likelihood of screening among women and individuals of South Asian origin.<sup>31</sup> Shah and Cook<sup>32</sup> found that living alone and low social support were more important than economic circumstances in explaining a lack of regular monitoring of hypertension. Sambamoorthi and McAlpine<sup>33</sup> reported that the US women of higher SES, as measured by educational levels, were significantly more likely to receive Pap tests, blood pressure checks, mammograms and cholesterol tests than women with lower education level. Preliminary reports based on the Istat survey showed higher rates of some cardiovascular preventive behaviours as cholesterol, glycaemia and blood pressure control in people with higher levels of education.<sup>22,23</sup>

In our study, the level of education was strongly associated with the adoption of all cardiovascular preventive behaviours. These findings may indicate that individuals with a lower education may have limited resources (e.g. motivation or financial resources) to take up preventive services.<sup>5</sup> Several studies suggest that chronic disease prevention requires individuals to adopt a proactive stance in gathering information, whereas disadvantaged people tend to seek help only when a

need emerges.<sup>34</sup> The benefits of prevention, in terms of reduced future morbidity and mortality, may not be correctly perceived or may be underestimated. Moreover, adults with cardiovascular risk factors are often unaware of recommended health-care services and their eligibility criteria.<sup>35</sup>

Occupational class was associated with preventive behaviours, but less clearly than education. This result may reflect the fact that the adoption of preventive behaviours is strongly influenced by knowledge and awareness of health risks, which are in turn more strongly associated with educational attainment than with occupation.<sup>20</sup>

Our estimates of the prevalence of preventive behaviours are smaller than those reported in previous studies.<sup>22,23</sup> This may be due to differences in the characteristics of the sample. Based on our inclusion criteria, we selected a generally healthier population compared with other studies.

The socio-economic disparities in the prevalence of preventive behaviours observed in this study may be associated with variations in the supply of health-care services, as well as with differences in the demand for prevention in different socio-economic groups. In Italy, primary care services (density of general practitioners and density of pharmacies) are distributed equally<sup>36</sup> throughout the country, without marked geographic or financial barriers. Given the fact that health care (included prevention) is free and there is a universal coverage of the population, it is likely that demand-side factors have a larger impact on the adoption of cardiovascular preventive behaviours than supply-side factors. However, on the basis of the available data, it is virtually impossible to discern the relative contribution of each of those factors.

Our study has some potential limitations. Relying on self-reported data for measuring the use of preventive services can lead to under- or over-reporting of chronic conditions and preventive behaviours with regard to cardiovascular risk factors. Moreover, self-reported data may be subject to recall bias.

Strengths of our study include the use of a large national population-based sample. This rich dataset provides detailed and up-to-date measures of health status and preventive behaviours. The use of multivariable logistic regression analysis allowed us to obtain a meaningful estimate of the effect of the two socio-economic variables, simultaneously adjusting for several confounders.

Our findings support the view that the prevention of cardiovascular risk factors should be a public health priority and preventive interventions should focus on socially disadvantaged groups. Despite comprehensive health insurance coverage, important disparities do exist in the Italian NHS.

The NPP recently developed in Italy recommends routine monitoring of blood pressure, cholesterol and glycaemia for adults aged 40–69 years. In addition, following the WHO European strategy ‘Gaining Health: European Strategy for the Prevention and Control of Noncommunicable Diseases’,<sup>37</sup> a programme called ‘Guadagnare salute’ was launched in 2007.<sup>38</sup> This framework programme aims to promote healthy lifestyles through improved nutritional habits, physical activity, reduced smoking and alcohol abuse. The programme combines population-level interventions with individual action on risk factors and their underlying determinants to strengthen the health system’s prevention capabilities. However, these programmes do not provide any quantitative target regarding socio-economic inequalities, nor indicators related to prevention policies.

In conclusion, we showed that lower educational level and occupational class are associated with underutilization of cardiovascular preventive behaviours. Primary care physicians may play a crucial role in order to contrast this phenomenon,

both in promoting healthy behaviours, according to national recommendations, and in meeting health demands from low socio-economic individuals. The development of specific health prevention strategies may reduce inequalities in the use of preventive care along with a systematic surveillance of cardiovascular risk factors in disadvantaged groups. Better understanding and awareness of disparities in health related to SES may support public health professionals in developing preventive programmes, targeting interventions of health promotion to lower socio-economic classes.

*Conflicts of interest:* None declared.

## Key points

- While in Italy many studies have shown the role of socio-economic determinants of inequalities in incidence and mortality for CVD, no results have been published on the influence of occupational class and educational level on the adoption of cardiovascular preventive behaviours.
- Results from this study show that marked inequalities in cardiovascular preventive behaviours exist.
- Systematic surveillance of cardiovascular risk factors in disadvantaged groups and interventions of health promotion targeting to lower socio-economic classes may reduce inequalities in the use of preventive care.

## References

- 1 Caiazzo A, Cardano M, Cois E, et al. Inequalities in health in Italy. *Epidemiol Prev* 2004;28(Suppl 3): 1–161.
- 2 Hertz RP, Unger AN, McDonald M, et al. The impact of obesity on work limitations and cardiovascular risk factors in the U.S. workforce. *J Occup Environ Med* 2004;46:1196–203.
- 3 Cooper R, Cutler J, Desvigne-Nickens P, et al. Trends and disparities in coronary heart disease, stroke, and other cardiovascular diseases in the United States: findings of the national conference on cardiovascular disease prevention. *Circulation* 2000;102:3137–47.
- 4 US Department of Health and Human Services. *Healthy People 2010*. Washington, DC: US Government Printing Office, 2000.
- 5 Qi V, Phillips SP, Hopman WM. Determinants of a healthy lifestyle and use of preventive screening in Canada. *BMC Public Health* 2006;6:275.
- 6 Piano Nazionale della Prevenzione 2005–2007. Available at: [http://www.ministerosalute.it/imgs/P\\_17\\_1\\_pnpHome\\_file\\_itemName\\_2\\_filePdf.pdf](http://www.ministerosalute.it/imgs/P_17_1_pnpHome_file_itemName_2_filePdf.pdf) (March 2010, date last accessed).
- 7 Lorant V, Boland B, Humblet P, Delière D. Equity in prevention and health care. *J Epidemiol Community Health* 2002;56:510–16.
- 8 Stewart SH, Silverstein MD. Racial and ethnic disparity in blood pressure and cholesterol measurement. *J Gen Intern Med* 2002;17:405–11.
- 9 Fiscella K, Franks P, Gold MR, Clancy CM. Inequality in quality. Addressing socioeconomic, racial, and ethnic disparities in health care. *JAMA* 2000;283: 2579–84.
- 10 Hertz RP, McDonald M, Unger AN, Lustik MB. Racial and ethnic disparities in the prevalence and management of cardiovascular risk factors in the United States workforce. *J Occup Environ Med* 2007;49:1165–75.
- 11 Van Doorslaer E, Masseria C, Koolman X for the OECD Health Equity Research Group. Inequalities in access to medical care by income in developed countries. *CMAJ* 2006;174:177–83.
- 12 World Health Organization. *Health for all*. Geneva: WHO, 1984.
- 13 Gouvernement du Québec, Ministère de la Santé et des Services sociaux. La politique de la santé et du bien-être. Montreal: Ministère de la Santé et des Services sociaux, 1992.
- 14 Haut Comité de la Santé Publique. La santé en France: rapport general. Paris: La Documentation Française, 1994.

- 15 Acheson D, Barker D, Chambers J, et al. *Independent inquiry into inequalities in health*. London: The Stationery Office, 1998.
- 16 Department of Health. *Reducing health inequalities: an action report*. London: Department of Health, 1999.
- 17 Piano Sanitario Nazionale 2006–2008. Available at: [http://www.ministerosalute.it/resources/static/primopiano/316/PSN\\_2006\\_08\\_28\\_marzo.pdf](http://www.ministerosalute.it/resources/static/primopiano/316/PSN_2006_08_28_marzo.pdf) (March 2010, last date accessed).
- 18 Petrelli A, Gnani R, Marinaccia C, Costa G. Socioeconomic inequalities in coronary heart disease in Italy: a multilevel population-based study. *Soc Sci Med* 2006;63:446–56.
- 19 Marinacci C, Spadea T, Biggeri A, et al. The role of individual and contextual socioeconomic circumstances on mortality: analysis of time variations in a city of North West Italy. *J Epidemiol Community Health* 2004;58:199–207.
- 20 Vescio MF, Smith GD, Giampaoli S. Socio-economic position and cardiovascular risk factors in an Italian rural population. *Eur J Epidemiol* 2001;17:449–59.
- 21 Ferrario M, Sega R, Chatenoud L, et al. MONICA-Brianza Research Group. MONItoring of Cardiovascular diseases. Time trends of major coronary risk factors in a northern Italian population (1986–1994). How remarkable are socioeconomic differences in an industrialized low CHD incidence country? *Int J Epidemiol* 2001;30:285–97.
- 22 Istituto nazionale di statistica (Istat). Condizioni di salute e ricorso ai servizi sanitari. Italy; 2005. Available at: <http://www.istat.it> (March 2010, last date accessed).
- 23 Mamo C, Landriscina T, Vannoni F, et al. Approfondimenti sull'indagine Multiscopo Istat 2005. *Monitor* 2008;22(Suppl 3): 143–60.
- 24 Barcaroli G, D'Aurizio L, Luzi O, et al. Metodi e software per il controllo e la correzione dei dati. [Methods and software for data control and correction.] Documenti Istat 1–1999.
- 25 National Institute of Health. The Practical Guide: Identification, Evaluation, and Treatment of Overweight and Obesity in Adults. National Institutes of Health, National Heart, Lung and Blood Institute North American Association for the Study of Obesity; 2000 Oct. NIH Publication Number 00-4084.
- 26 Chobanian AV, Bakris GL, Black HR, et al. for the National Heart, Lung, and Blood Institute. The Seventh Report of the Joint National Committee on Prevention, Detection, Evaluation, and Treatment of High Blood Pressure. *JAMA* 2003;289:2560–72.
- 27 Helfand M, Carson S. Screening for Lipid Disorders in Adults: Selective Update of 2001 U.S. Preventive Services Task Force Review. Evidence Synthesis No. 49. Rockville, MD: Agency for Healthcare Research and Quality; 2008. AHRQ Publication no. 08-05114-EF-1.
- 28 Feig DS, Palda VA, Lipscombe L, with the Canadian Task Force on Preventive Health Care. Screening for type 2 diabetes mellitus to prevent vascular complications: updated recommendations from the Canadian Task Force on Preventive Health Care. *CMAJ* 2005;2:177–80.
- 29 Rose D, Pevalin D. *The national statistics socio-economic classification: genesis and overview*. London: Office of National Statistics, 2001.
- 30 Wong R, Diaz JJ. Health care utilization among older Mexicans: health and socioeconomic inequalities. *Salud pública Méx* 2007;49(Suppl 4):505–14.
- 31 Bartys S, Baker D, Lewis P, Middleton E. Inequity in recording of risk in a local population-based screening programme for cardiovascular disease. *Eur J Cardiovasc Prev Rehabil* 2005;12:63–7.
- 32 Shah S, Cook DG. Inequalities in the treatment and control of hypertension: age, social isolation and lifestyle are more important than economic circumstances. *J Hypertens* 2001;19:1333–40.
- 33 Sambamoorthi U, McAlpine DD. Racial, ethnic, socioeconomic, and access disparities in the use of preventive services among women. *Prev Med* 2003;37:475–84.
- 34 Freimuth VS, Mettger W. Is there a hard-to-reach audience? *Public Health Rep* 1990;105:232–8.
- 35 Ross JS, Bradley EH, Busch SH. Use of health care services by lower-income and higher-income uninsured adults. *JAMA* 2006;295:2027–36.
- 36 Istituto nazionale di statistica (Istat). Annuario statistico italiano 2009. Italy, 2009. Available at: [http://www.istat.it/dati/catalogo/20091120\\_00/](http://www.istat.it/dati/catalogo/20091120_00/) (March 2010, last date accessed).
- 37 World Health Organization. Gaining health: European strategy for the prevention and control of noncommunicable diseases. Copenhagen: WHO Regional Office for Europe, 2006.
- 38 Ministero della Salute. Guadagnare salute. Rendere facili le scelte salutari, 2007 Available at: [http://www.ministerosalute.it/imgs/C\\_17\\_pubblicazioni\\_605\\_allegato.pdf](http://www.ministerosalute.it/imgs/C_17_pubblicazioni_605_allegato.pdf) (March 2010, last date accessed).
